# Supplementary material for: Epigenomic heterogeneity as a source of tumour evolution
Source: Springer Nature journal article supplement (doi:10.1038/s41568-024-00757-9), 2024-10-16
Supplement: 41568_2024_757_MOESM1_ESM.pdf [file 41568_2024_757_MOESM1_ESM.pdf]

**Supplementary information**

---

# Epigenomic heterogeneity as a source of tumour evolution

---

**In the format provided by  
the authors and unedited**

| Year | Publication                     | Sample                                       | Sample2     | Fresh_Frozen              | Omics                   | Technology | Techno_Mode | Throughput | Type of epigenomic modification | Mono or Multiple omics |
|------|---------------------------------|----------------------------------------------|-------------|---------------------------|-------------------------|------------|-------------|------------|---------------------------------|------------------------|
| 2019 | Satpathy 2019 Nat Biotech       | Basal cell carcinoma - immune cells          | CTC_Hemato  | Fresh                     | Chromatin Accessibility | scATACseq  | Droplet     | High       | Chromatin Accessibility         | Mono                   |
| 2019 | Wang 2019 Cancer Discovery      | Glioma                                       | Glioma      | Frozen                    | Chromatin Accessibility | scATACseq  | Droplet     | High       | Chromatin Accessibility         | Mono                   |
| 2019 | Granja 2019 Nat Biotech         | Mixed phenotype acute leukemia               | CTC_Hemato  | Frozen                    | Chromatin Accessibility | scATACseq  | Droplet     | High       | Chromatin Accessibility         | Mono                   |
| 2020 | Shu 2020 Mol Cell               | TNBC - cell lines                            | CellLine    | Frozen                    | Chromatin Accessibility | scATACseq  | Droplet     | High       | Chromatin Accessibility         | Mono                   |
| 2021 | Frede 2021 Nat Cell Biol        | Multiple myeloma                             | CTC_Hemato  | Fresh/Frozen              | Chromatin Accessibility | scATACseq  | NA          | NA         | Chromatin Accessibility         | Mono                   |
| 2021 | Taavitsainen 2021 Nat Comm      | Prostate cancer cell lines                   | CellLine    | Fresh                     | Chromatin Accessibility | scATACseq  | Droplet     | High       | Chromatin Accessibility         | Mono                   |
| 2021 | Zhang 2021 Cancer Cell          | Triple negative cancer (TNBC) - immune cells | CTC_Hemato  | Fresh                     | Chromatin Accessibility | scATACseq  | Droplet     | High       | Chromatin Accessibility         | Mono                   |
| 2021 | Kashima 2021 Cancer Research    | Drug resistant lung cancer cell lines        | CellLine    | Fresh                     | Chromatin Accessibility | scATACseq  | Droplet     | High       | Chromatin Accessibility         | Mono                   |
| 2021 | Regner 2021 Mol Cell            | Ovarian & endometrial cancers                | Multiple    | Fresh                     | Chromatin Accessibility | scATACseq  | Droplet     | High       | Chromatin Accessibility         | Mono                   |
| 2021 | Nikolic 2021 Sci Adv            | Glioma                                       | Glioma      | Frozen                    | Chromatin Accessibility | scATACseq  | Droplet     | High       | Chromatin Accessibility         | Mono                   |
| 2021 | Guilhamon 2021 eLife            | Glioma                                       | Glioma      | Frozen                    | Chromatin Accessibility | scATACseq  | Droplet     | High       | Chromatin Accessibility         | Mono                   |
| 2021 | Zhang 2021 Nature Commun        | Spinal ependymomas                           | Ependymomas | Frozen                    | Chromatin Accessibility | scATACseq  | Droplet     | High       | Chromatin Accessibility         | Mono                   |
| 2021 | Mei 2021 Clin Trans Med         | Colorectal cancer                            | Colorectal  | Fresh (CryoP after disso) | Chromatin Accessibility | scATACseq  | Droplet     | High       | Chromatin Accessibility         | Mono                   |
| 2021 | Xu 2021 Hum Mol Genet           | Breast metastasis                            | Breast      | Fresh                     | Chromatin Accessibility | scATACseq  | Droplet     | High       | Chromatin Accessibility         | Mono                   |
| 2021 | Singh 2021 Gastroenterology     | Barret metaplasia                            | Oesophagus  | Frozen                    | Chromatin Accessibility | scATACseq  | Droplet     | High       | Chromatin Accessibility         | Mono                   |
| 2021 | Wang 2021 Clin Cancer Research  | Bladder cancer                               | Bladder     | Fresh (CryoP after disso) | Chromatin Accessibility | scATACseq  | Droplet     | High       | Chromatin Accessibility         | Mono                   |
| 2021 | Schwartz 2021 Cell Reports      | Drug resistant leukemic T cells              | CellLine    | NA                        | Chromatin Accessibility | scATACseq  | Droplet     | High       | Chromatin Accessibility         | Mono                   |
| 2021 | Pierce 2021 Nature Commun       | Human cancer cell lines                      | CellLine    | Fresh                     | Chromatin Accessibility | Spear-Seq  | Droplet     | High       | Chromatin Accessibility         | Mono                   |
| 2021 | Babikir 2021 Genome Biol        | Glioma                                       | Glioma      | Fresh                     | Chromatin Accessibility | scATACseq  | Droplet     | High       | Chromatin Accessibility         | Mono                   |
| 2022 | Wang 2022 Nature Communications | Papillary renal cell carcinoma (pRCC)        | Renal       | Fresh                     | Chromatin Accessibility | scATACseq  | Droplet     | High       | Chromatin Accessibility         | Mono                   |
| 2022 | Wang 2022 Nat Cancer            | Glioma                                       | Glioma      | Frozen                    | Chromatin Accessibility | scATACseq  | Droplet     | High       | Chromatin Accessibility         | Mono                   |
| 2022 | Becker 2022 Nat Genetics        | Colorectal cancer                            | Colorectal  | Frozen                    | Chromatin Accessibility | scATACseq  | Droplet     | High       | Chromatin Accessibility         | Mono                   |
| 2022 | Long 2022 Cell discovery        | Clear cell renal carcinoma                   | Renal       | Fresh                     | Chromatin Accessibility | scATACseq  | Droplet     | High       | Chromatin Accessibility         | Mono                   |
| 2022 | Kumegawa 2022 NPJ Breast Cancer | Breast Cancer                                | Breast      | Fresh                     | Chromatin Accessibility | scATACseq  | Droplet     | High       | Chromatin Accessibility         | Mono                   |
| 2022 | Itahashi 2022 Sci Immunol       | Immune cells from NSCLC                      | CTC_Hemato  | Fresh                     | Chromatin Accessibility | scATACseq  | Droplet     | High       | Chromatin Accessibility         | Mono                   |
| 2023 | Fan 2023 Mol Ther Nucleic Acids | Prostate cancer cell line                    | CellLine    | NA                        | Chromatin Accessibility | scATACseq  | Droplet     | High       | Chromatin Accessibility         | Mono                   |

|      |                             |                                           |            |                                |                                 |              |               |      |                         |              |
|------|-----------------------------|-------------------------------------------|------------|--------------------------------|---------------------------------|--------------|---------------|------|-------------------------|--------------|
| 2023 | Zhu 2023 Nat Comm           | Human cancer cell lines                   | CellLine   | NA                             | Chromatin Accessibility         | scATACseq    | Droplet       | High | Chromatin Accessibility | Mono         |
| 2023 | Riegel 2023 Mol Cell        | Immune cells from 4 cancer types          | CTC_Hemato | Fresh                          | Chromatin Accessibility         | scATACseq    | Plate         | Low  | Chromatin Accessibility | Mono         |
| 2023 | Craig 2023 Cell Rep         | Liver cancer                              | Liver      | Fresh                          | Chromatin Accessibility         | scATACseq    | Droplet       | High | Chromatin Accessibility | Mono         |
| 2023 | Yu 2023 Cancer Res          | Clear cell renal carcinoma                | Renal      | Fresh                          | Chromatin Accessibility         | scATACseq    | Droplet       | High | Chromatin Accessibility | Mono         |
| 2023 | Leblay 2023 Blood           | Multiple myeloma                          | CTC_Hemato | Fresh (CryoP after enrichment) | Chromatin Accessibility         | scATACseq    | Droplet       | High | Chromatin Accessibility | Mono         |
| 2023 | Poos 2023 Blood             | Multiple myeloma (therapy)                | CTC_Hemato | Fresh (CryoP after enrichment) | Chromatin Accessibility         | scATACseq    | Droplet       | High | Chromatin Accessibility | Mono         |
| 2023 | Li Pharmacol 2023 Res       | Colorectal cancer (PDX)                   | Colorectal | Fresh                          | Chromatin Accessibility         | scATACseq    | Droplet       | High | Chromatin Accessibility | Mono         |
| 2023 | John 2023 Nature Commun     | Multiple myeloma                          | CTC_Hemato | Fresh (CryoP after enrichment) | Chromatin Accessibility         | scATACseq    | Droplet       | High | Chromatin Accessibility | Mono         |
| 2023 | Sun 2023 J Pharm anal       | Colorectal cancer (PDX)                   | Colorectal | Fresh                          | Chromatin Accessibility         | scATACseq    | Droplet       | High | Chromatin Accessibility | Mono         |
| 2023 | Zou 2023 Elife              | Squamous cell carcinoma & in situ lesions | Skin       | Fresh                          | Chromatin Accessibility         | scATACseq    | Droplet       | High | Chromatin Accessibility | Mono         |
| 2023 | Kim 2023 Int J Mol Sci      | Male Breast cancer                        | Breast     | Fresh                          | Chromatin Accessibility         | scATACseq    | Droplet       | High | Chromatin Accessibility | Mono         |
| 2023 | Pratt 2023 Clin Trans Med   | PDAC                                      | Pancreas   | Frozen                         | Chromatin Accessibility         | scATACseq    | Droplet       | High | Chromatin Accessibility | Mono         |
| 2019 | Liu 2019 Nat Comm           | Cell lines & PDX                          | Multiple   | Fresh                          | Multi-modal RNA/Chromatin acc.  | scCAT-seq    | Plate         | Low  | Chromatin Accessibility | MultiRNA/DNA |
| 2019 | Chen 2019 Nat Biotechno     | Cell lines                                | CellLine   | Fresh                          | Multi-modal RNA/Chromatin acc.  | SNARE-seq    | Droplet       | High | Chromatin Accessibility | MultiRNA/DNA |
| 2021 | Lareau 2021 Nat Biotech     | Chronic lymphocytic leukemia + CRC        | Multiple   | Frozen (CCL) + Fresh (CRC)     | Chromatin Accessibility         | scATACseq    | Droplet       | High | Chromatin Accessibility | MultiRNA/DNA |
| 2022 | Anadon Cancer Cell 2022     | Immune cells from ovarian cancers         | CTC_Hemato | Fresh                          | Multi-modal RNA/Chromatin acc.  | snRNA/snATAC | Droplet       | High | Chromatin Accessibility | MultiRNA/DNA |
| 2022 | Foster 2022 Cancer Cell     | Breast cancer                             | Breast     | Fresh                          | Multi-modal RNA/Chromatin acc.  | snRNA/snATAC | Droplet       | High | Chromatin Accessibility | MultiRNA/DNA |
| 2023 | Liu 2023 Nature Commun      | Rhabdoid tumors                           | Rhabdoid   | NA                             | Multi-modal RNA/Chromatin acc.  | snRNA/snATAC | Droplet       | High | Chromatin Accessibility | MultiRNA/DNA |
| 2023 | Turkajl 2023 Cell Stem Cell | AML (& AML cell lines)                    | CTC_Hemato | Frozen (CryoP)                 | Multi-modal DNA / Chromatin acc | GTAC         | Plate         | Low  | Chromatin Accessibility | MultiDNA/DNA |
| 2023 | Otto 2023 Mol Cell          | AML cell lines                            | CellLine   | Fresh                          | Multi-modal RNA/Chromatin acc.  | SHARE-seq    | Combinatorial | High | Chromatin Accessibility | MultiRNA/DNA |
| 2023 | Lambo 2023 Cancer Cell      | Pediatric AML                             | CTC_Hemato | Frozen (CryoP)                 | Multi-modal RNA/Chromatin acc.  | snRNA/snATAC | Droplet       | High | Chromatin Accessibility | MultiRNA/DNA |
| 2023 | Derrien 2023 Nat Cancer     | Multiple myeloma                          | CTC_Hemato | Frozen (CryoP)                 | Multi-modal RNA/Chromatin acc.  | snRNA/snATAC | Droplet       | High | Chromatin Accessibility | MultiRNA/DNA |

|      |                                      |                                                    |            |               |                                   |                    |                   |      |                         |              |
|------|--------------------------------------|----------------------------------------------------|------------|---------------|-----------------------------------|--------------------|-------------------|------|-------------------------|--------------|
| 2023 | Terekhanova Nature 2023              | Multiple tumor types                               | Multiple   | Frozen        | Multi-modal RNA/Chromatin acc.    | snRNA/snATAC       | Droplet           | High | Chromatin Accessibility | MultiRNA/DNA |
| 2023 | Raviram 2023 PNAS                    | Glioma                                             | Glioma     | Frozen        | Multi-modal RNA/Chromatin acc.    | Paired-seq         | Combinatorial     | High | Chromatin Accessibility | MultiRNA/DNA |
| 2015 | Kind 2015 Cell                       | Chronic myelogenous leukemia (KBM-7)               | CellLine   | Fresh         | Chromatin conformation            | single cell DamID  | Tube              | Low  | Chromatin conformation  | Mono         |
| 2017 | Ramani 2017 Nat Methods              | Chronic lymphocytic leukemia cell lines (K562)     | CellLine   | Fresh         | Chromatin conformation            | single-cell Hi-C   | Combinatorial     | High | Chromatin conformation  | Mono         |
| 2015 | Farlik 2015 Cell Reports             | Chronic myeloid leukemia cell line (K562)          | CellLine   | Fresh         | DNA methylation                   | scWGBS             | Tube              | Low  | DNA methylation         | Mono         |
| 2017 | Han 2017 NAR                         | Chronic myeloid leukemia cell line (K562)          | CellLine   | Fresh         | DNA methylation                   | scCGI-seq          | Manual picking    | Low  | DNA methylation         | Mono         |
| 2017 | Pixberg 2017 Oncogene                | Circulating tumor cells                            | CTC_Hemato | Fresh         | DNA methylation                   | scAEBS             | Tube              | Low  | DNA methylation         | Mono         |
| 2019 | Gkoutela 2019 Cell                   | Circulating tumor cells                            | CTC_Hemato | Fresh         | DNA methylation                   | scWGBS             | Tube              | Low  | DNA methylation         | Mono         |
| 2020 | Grants 2020 Blood                    | Acute myeloid leukemia                             | CTC_Hemato | Fresh         | DNA methylation                   | PBAL               | Plate             | Low  | DNA methylation         | Mono         |
| 2020 | Meir 2020 Nat Genet                  | CRC cell line                                      | CellLine   | Fresh         | DNA methylation                   | snmC-seq           | Plate             | Low  | DNA methylation         | Mono         |
| 2021 | Johnson 2021 Nat Genet               | Glioma                                             | Glioma     | Fresh         | DNA methylation                   | scRRBS             | Plate             | Low  | DNA methylation         | Mono         |
| 2021 | Shareef 2021 Nat Biotech             | Chronic myeloid leukemia cell line (K562)          | CellLine   | Fresh         | DNA methylation                   | scXRBS             | Plate             | Low  | DNA methylation         | Mono         |
| 2021 | Chen 2021 Chin J Cancer Res          | Circulating tumor cells                            | CTC_Hemato | Fresh         | DNA methylation                   | scBS-seq           | micromanipulation | Low  | DNA methylation         | Mono         |
| 2021 | Huang 2021 Brief Bioinform           | Colorectal cancer (CRC)                            | Colorectal | Fresh         | DNA methylation                   | scBS-seq           | Tube              | Low  | DNA methylation         | Mono         |
| 2021 | Niemöller 2021 Communication Biology | Acute myeloid leukemia cell line                   | CellLine   | Fresh         | DNA methylation                   | epi-gSCAR          | Plate             | Low  | DNA methylation         | Mono         |
| 2022 | Hunt 2022 Science Report             | Acute myeloid leukemia cell line and primary cells | CellLine   | Fresh         | DNA methylation                   | scTEM-seq          | Plate             | Low  | DNA methylation         | Mono         |
| 2016 | Hou 2016 Cell Research               | Hepatocellular carcinoma                           | Liver      | Fresh         | Multi-modal RNA/DNA met./CNV      | scTrio-seq         | Tube              | Low  | DNA methylation         | MultiRNA/DNA |
| 2016 | Cheow 2016 Nature Methods            | Lung adenocarcinoma                                | Lung       | Fresh (cryoP) | Multi-modal DNA met./RNA/genotype | sc-GEM             | Fluidigm          | Low  | DNA methylation         | MultiRNA/DNA |
| 2018 | Bian 2018 Science                    | Colorectal cancer                                  | Colorectal | Fresh         | Multi-modal RNA/DNA met./CNV      | scTrio-seq 2       | Tube              | Low  | DNA methylation         | MultiRNA/DNA |
| 2019 | Pastore 2019 Nat Comm                | Chronic lymphocytic leukemia                       | CTC_Hemato | CryoP         | Multi-modal RNA/DNA met.          | Join MscRRBS + RNA | Plate             | Low  | DNA methylation         | MultiRNA/DNA |
| 2019 | Gaiti 2019 Nature                    | Chronic lymphocytic leukaemia                      | CTC_Hemato | Fresh         | Multi-modal RNA/DNA met.          | Join scRRBS + RNA  | Plate             | Low  | DNA methylation         | MultiRNA/DNA |
| 2021 | Chaligné 2021 Nat Genet              | Glioma                                             | Glioma     | Fresh         | Multi-modal RNA/DNA met./SVs      | Join MscRRBS + RNA | Plate             | Low  | DNA methylation         | MultiRNA/DNA |
| 2018 | Harada 2018 Nat Cell Bio             | Breast cancer cell lines                           | CellLine   | Fresh         | Histone modifications             | scChIL-seq         | Plate             | Low  | Histone modifications   | Mono         |
| 2019 | Grosselin 2019 Nat Genet             | TNBC (PDX)                                         | Breast     | Fresh         | Histone modifications             | scChIPseq          | Droplet           | High | Histone modifications   | Mono         |
| 2021 | Bartlett 2021 J Cell Biol            | CRC cell line                                      | CellLine   | Fresh         | Histone modifications             | sciTIP-seq         | Split-Pool        | High | Histone modifications   | Mono         |
| 2021 | Wu 2021 Nat Biotech                  | Glioma                                             | Glioma     | Frozen        | Histone modifications             | scCUT&Tag          | Droplet           | High | Histone modifications   | Mono         |
| 2021 | Janssens 2021 Nat Genet              | Leukemia                                           | CTC_Hemato | Fresh (CryoP) | Histone modifications             | autoCUT&Tag        | Plate             | Low  | Histone modifications   | Mono         |

|      |                            |                                     |          |        |                                          |                     |                     |                 |                       |          |
|------|----------------------------|-------------------------------------|----------|--------|------------------------------------------|---------------------|---------------------|-----------------|-----------------------|----------|
| 2022 | Marsolier 2022 Nat Genet   | TNBC cell lines                     | CellLine | Fresh  | Histone modifications                    | scChIPseq           | Droplet             | High            | Histone modifications | Mono     |
| 2022 | Harpaz 2022 Mol Cell       | Pediatric Glioma primary culture    | CellLine | Fresh  | Histone modifications                    | CyTOF               | Droplet             | High            | Histone modifications | Mono     |
| 2017 | Pott 2017 Elife            | Leukemia cell lines (K562, GM12878) | CellLine | Fresh  | Multi-modal DNA met./Chromatin acc.      | scNOME-seq          | Plate               | Low             | MultiEpi              | MultiEpi |
| 2022 | Tedesco 2021 Nat Biotech   | CRC cell lines                      | CellLine | Fresh  | Multi-modal Heterochromatin/Eu chromatin | scGETseq            | Droplet             | High            | MultiEpi              | MultiEpi |
| 2022 | Fan 2022 Cell Discovery    | Pancreatic ductal adenocarcinoma    | Pancreas | Fresh  | Multi-modal RNA/DNA met./Chromatin acc.  | scCOOL-seq/STRT-seq | Plate               | Low             | MultiEpi              | MultiEpi |
| 2023 | Bobadilla 2023 Nat Biotech | HER2 breast cancer                  | Breast   | Frozen | Spatial Chromatin Accessibility          | spatial ATAC        | Solid phase capture | Not single cell | Spatial Epi           | Mono     |
